# Supplementary material
Source: publisher site journal article supplement (https://www.dovepress.com/article/352057)
Supplement: Supplementary file 1 [file get_supplementary_file.php]

**Supplementary materials
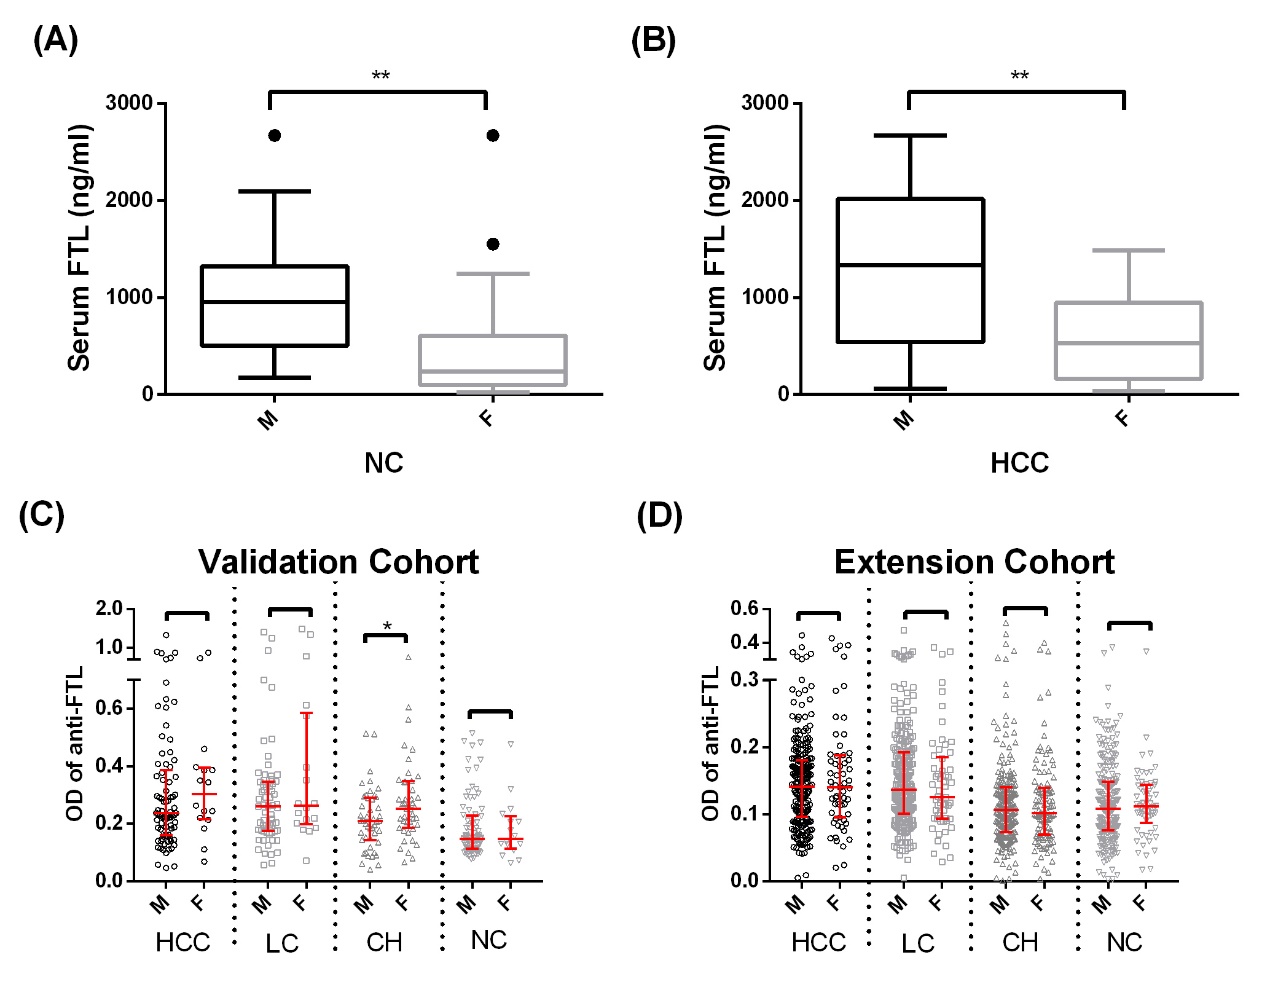
**

**Figure S1** Analysis of the impact of gender on serum FTL and serum anti-FTL in HCC patients and controls. (A) Comparison of serum FTL concentration between males and females of normal individuals; (B) Comparison of serum FTL concentration between males and females of HCC patients; (C) Comparison of anti-FTL titers between males and females of HCC patients, LC patients, CH patients and normal individuals of the validation cohort; (D) Comparison of anti-FTL titers between males and females of HCC patients, LC patients, CH patients and normal individuals in the validation cohort. HCC: hepatocellular carcinoma, LC: liver cirrhosis, CH: chronic hepatitis, NC: normal controls, M: males, F: females. *: *P* < 0.05, **: *P* <0.01.

**
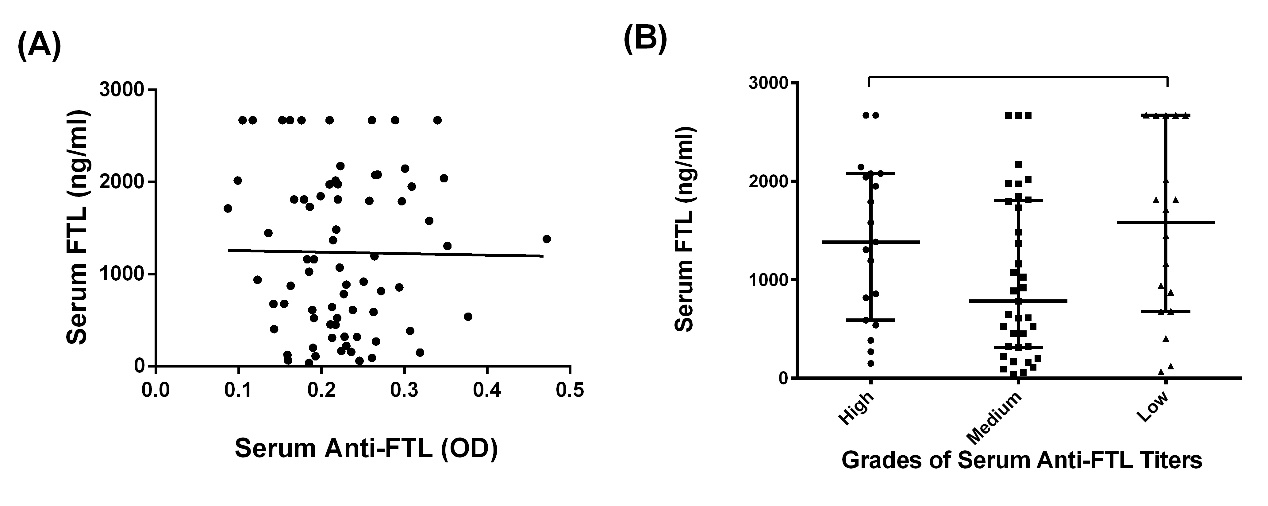
**

**Figure S2** Correlation analysis of serum anti-FTL and serum FTL. (**A**) Scatter plot of correlation analysis between serum FTL concentration and serum anti-FTL in HCC patients; (**B**) Comparison of the serum FTL antigen concentrations of HCC patients with different grades of anti-FTL antibody titers, High: HCC patients with OD of anti-FTL ≥ Percentile 75 of all HCC patients, Medium: Percentile 75 < HCC patients with OD of anti-FTL ≤ Percentile 25, Low: HCC patients with OD of anti-FTL < Percentile 25.

**
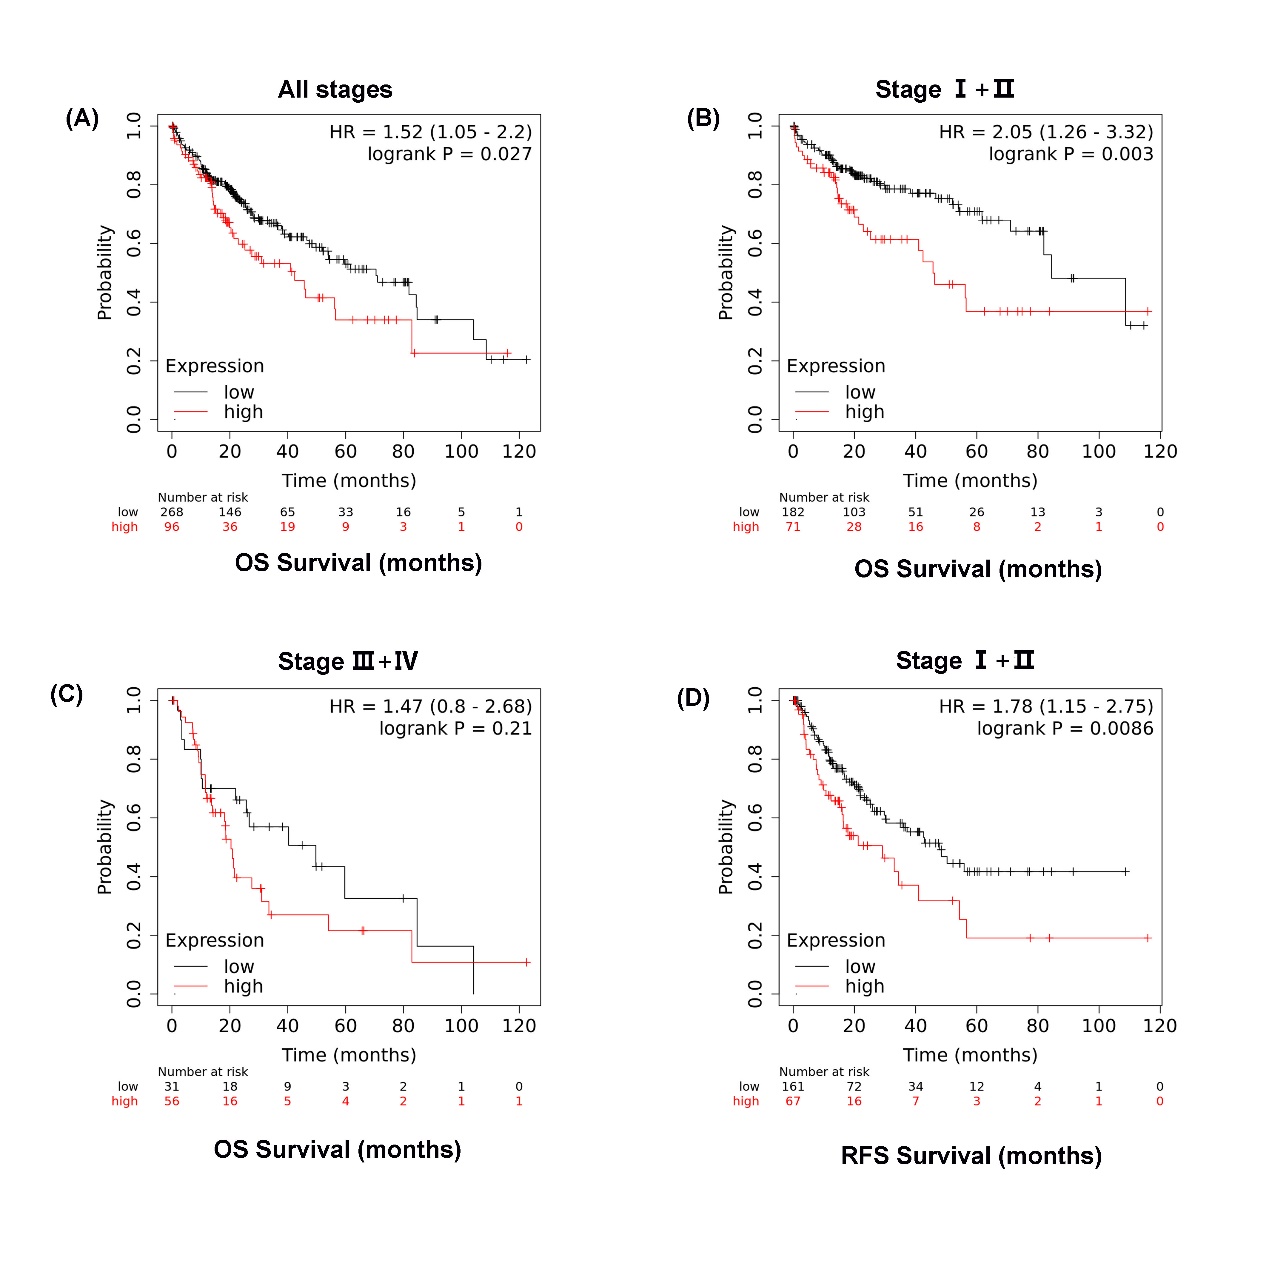
**

**Figure S3** Survival curves of HCC patients with different expression level of FTL gene. (**A**) Overall survival curves of HCC patients of all stages in high and low FTL expression groups; (**B**) Overall survival curves of stage I and stage II patients in high and low FTL expression groups; (**C**) Overall survival curves of stage III and stage IV patients in high and low FTL expression groups; (**D**) Recurrence-free survival curves of stage I and stage II patients in high and low FTL expression groups. OS: overall survival, RFS: recurrence-free survival, HR: Hazards ratio.
